# Supplementary material for: Microbial community and metabolic pathway succession driven by changed nutrient inputs in tailings: effects of different nutrients on tailing remediation
Source: PubMed Central journal article supplement (PMC5428726; doi:10.1038/s41598-017-00580-3), 2017-03-28
Supplement: 41598_2017_580_MOESM1_ESM.pdf [file 41598_2017_580_MOESM1_ESM.pdf]

Microbial community and metabolic pathway succession driven by changed nutrient inputs in tailings: effects of different nutrients on tailing remediation

Mingjiang Zhang, Xingyu Liu\*, Yibin Li, Guangyuan Wang, Zining Wang, Jiankang Wen

National Engineering Laboratory of Biohydrometallurgy, General Research Institute for Nonferrous Metals, No. 2 Xijiekouwai Street, Beijing, China 100088.

Corresponding author: \*wellwoodliu@163.com, 8610-82241312

**Fig caption:**

**Fig. S1 The qRT-PCR results of microbial biomass with universal primers.**

**Fig. S2 Alpha diversity index of microbial community**

**Fig. S3 The heat map of the key microbes in different experiment treatment**

**Fig. S4 Visualization the differences of sulfur metabolism genes that differed significantly ( $p < 0.05$ ) by box plot**

**Fig. S5 Microbial community of remediation experiment on the natural conditions**

**Fig. S6 Remediation experiment of tailings on the natural conditions**

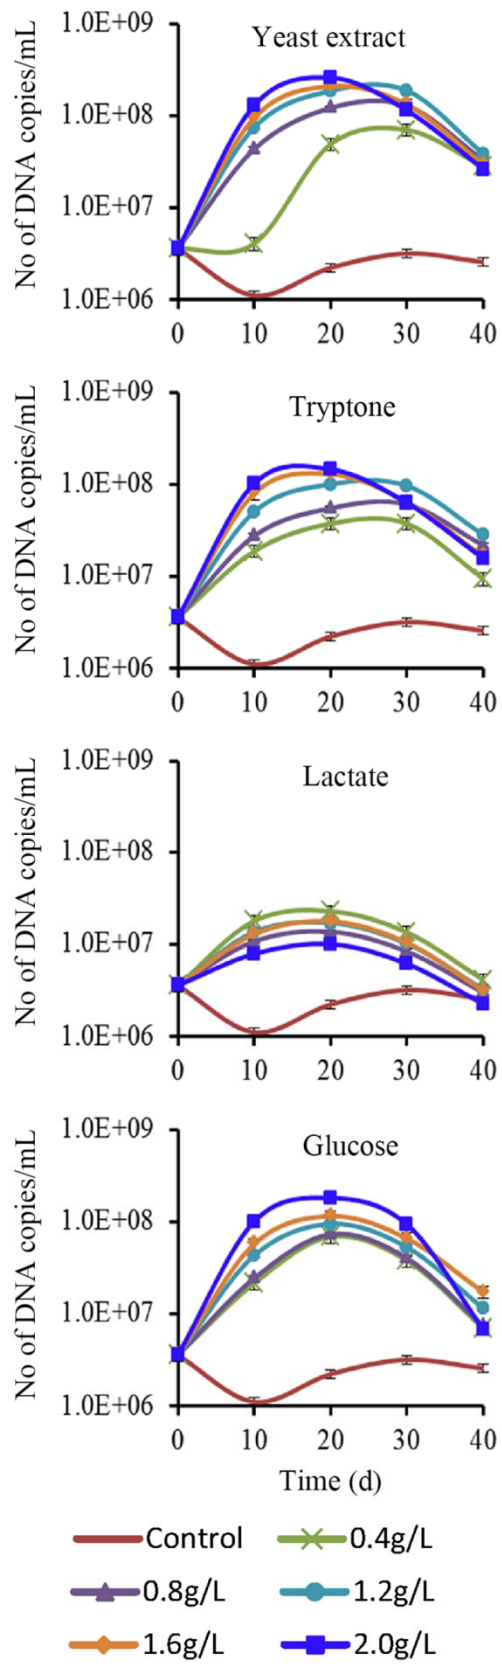

Fig. S1 The qRT-PCR results of microbial biomass with universal primers.

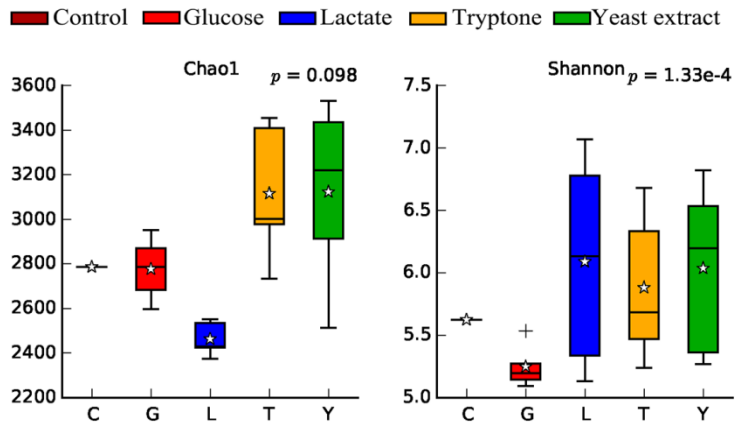

**Fig. S2 Alpha diversity index of microbial community**

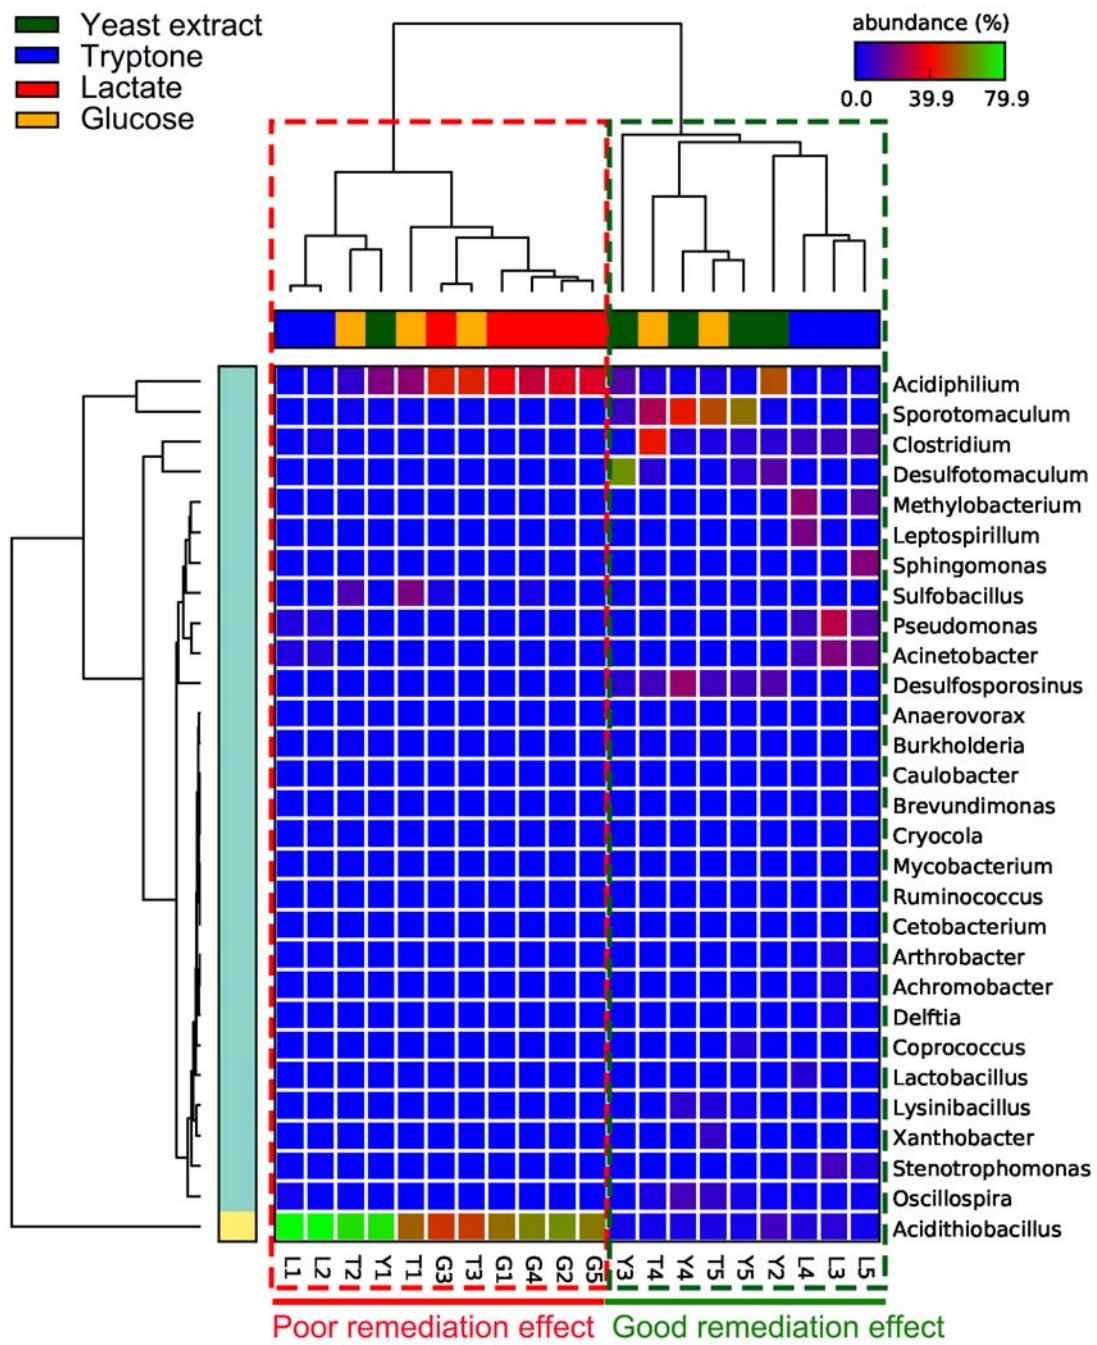

Fig. S3 The heat map of the key microbes in different experiment treatment

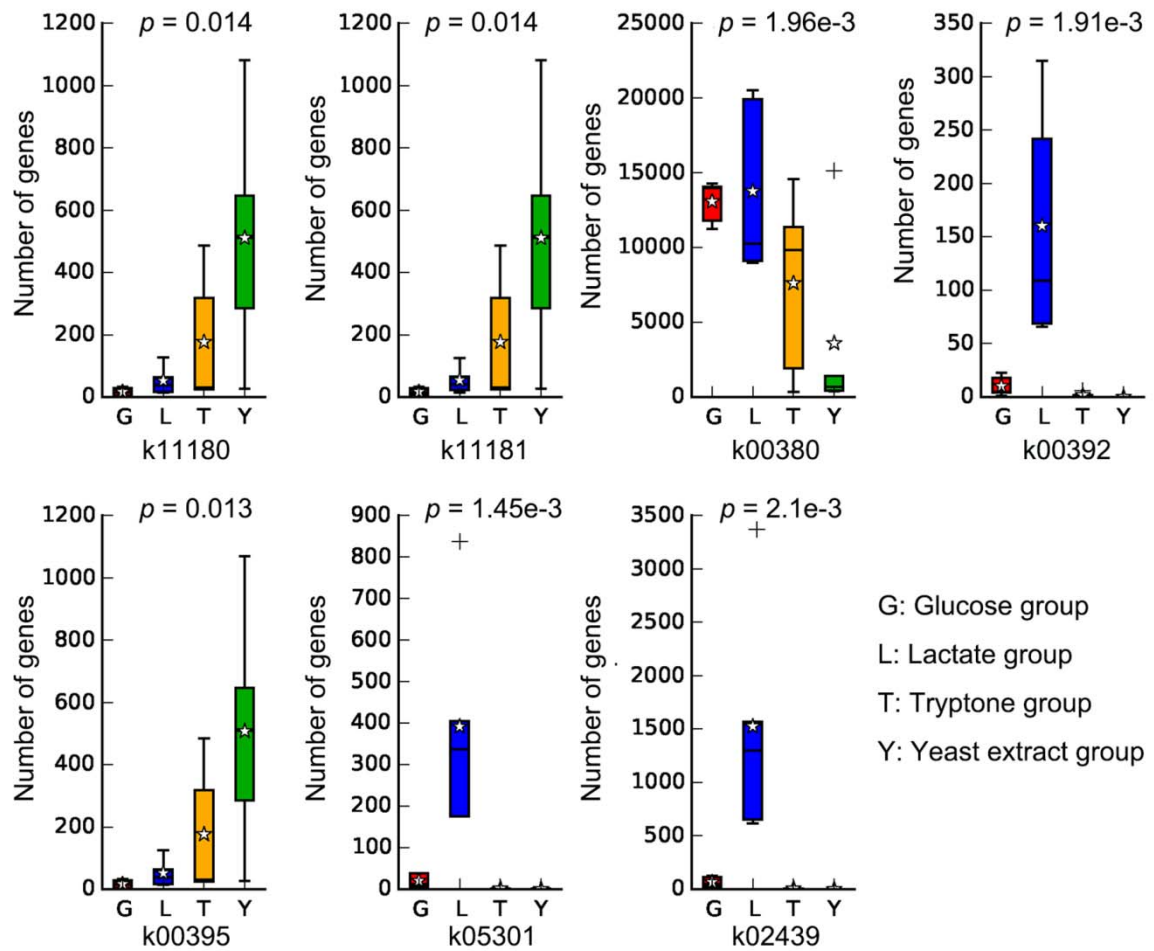

**Fig. S4 Visualization the differences of sulfur metabolism genes that differed significantly ( $p < 0.05$ ) by box plot**

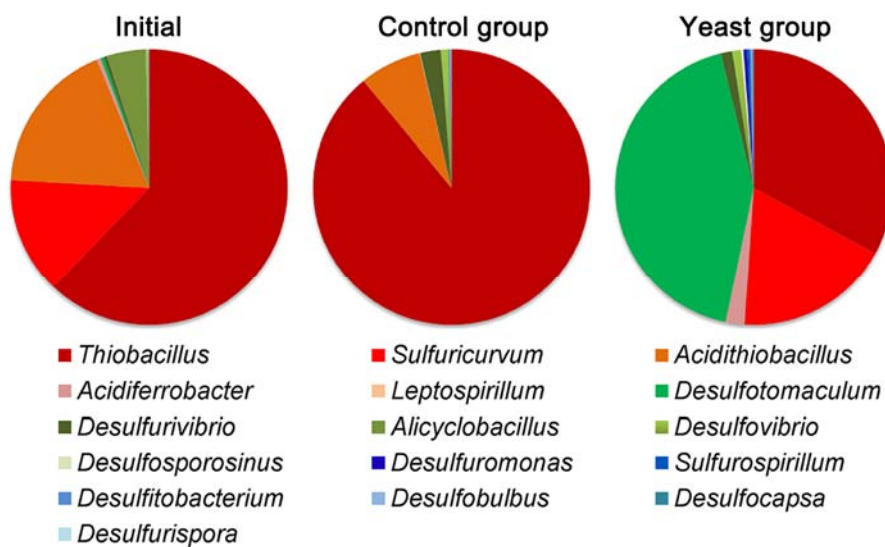

**Fig. S5 Microbial community of remediation experiment on the natural conditions**

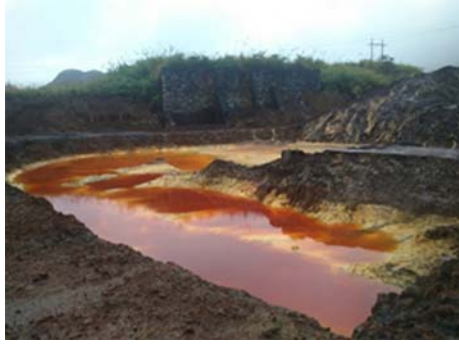

**Fig. S6 Remediation experiment of tailings on the natural conditions**
